# Supplementary material for: An improved multiply robust estimator for the average treatment effect
Source: Springer Nature journal article supplement (doi:10.1186/s12874-023-02056-7), 2023-10-11
Supplement: MOESM1 [file 26152002]

**Supplementary materials for “An improved multiply robust estimator for the average treatment effect”**

Ce Wang\*, Kecheng Wei\*, Chen Huang, Yongfu Yu, Guoyou Qin

Department of Biostatistics, Key Laboratory for Health Technology Assessment,  
National Commission of Health, Key Laboratory of Public Health Safety of Ministry  
of Education, School of Public Health, Fudan University, Shanghai, China

\* These authors contributed equally.

**Correspondence to:** Guoyou Qin [gyqin@fudan.edu.cn](mailto:gyqin@fudan.edu.cn), Yongfu Yu [yu@fudan.edu.cn](mailto:yu@fudan.edu.cn)

**Table S1.** Baseline characteristics between chemotherapy and non-chemotherapy groups

|                            | Non-social activity group | Social activity group |        |
|----------------------------|---------------------------|-----------------------|--------|
| Marital                    |                           |                       | <0.001 |
| Yes                        | 3831 (77.5)               | 4203 (81.2)           |        |
| No                         | 1111 (22.5)               | 974 (18.8)            |        |
| Sex                        |                           |                       | 0.083  |
| Male                       | 2484 (50.3)               | 2512 (48.5)           |        |
| Female                     | 2458 (49.7)               | 2665 (51.5)           |        |
| Urban                      |                           |                       | <0.001 |
| Yes                        | 960 (19.4)                | 1502 (29.0)           |        |
| No                         | 3982 (80.6)               | 3675 (71.0)           |        |
| Smoke                      |                           |                       | 0.728  |
| Yes                        | 2006 (40.6)               | 2120 (41.0)           |        |
| No                         | 2936 (59.4)               | 3057 (59.0)           |        |
| Hypertension               |                           |                       | 0.185  |
| Yes                        | 1262 (25.5)               | 1383 (26.7)           |        |
| No                         | 3680 (74.5)               | 3794 (73.3)           |        |
| Diabetes                   |                           |                       | 0.002  |
| Yes                        | 255 ( 5.2)                | 343 ( 6.6)            |        |
| No                         | 4687 (94.8)               | 4834 (93.4)           |        |
| Heart disease              |                           |                       | 0.619  |
| Yes                        | 659 (13.3)                | 672 (13.0)            |        |
| No                         | 4283 (86.7)               | 4505 (87.0)           |        |
| Stroke                     |                           |                       | 0.776  |
| Yes                        | 112 ( 2.3)                | 112 ( 2.2)            |        |
| No                         | 4830 (97.7)               | 5065 (97.8)           |        |
| Depression level (mean±SD) | 20.42 (5.22)              | 19.78 (4.72)          | <0.001 |
| Age (mean±SD)              | 60.74 (10.19)             | 58.99 (10.14)         | <0.001 |

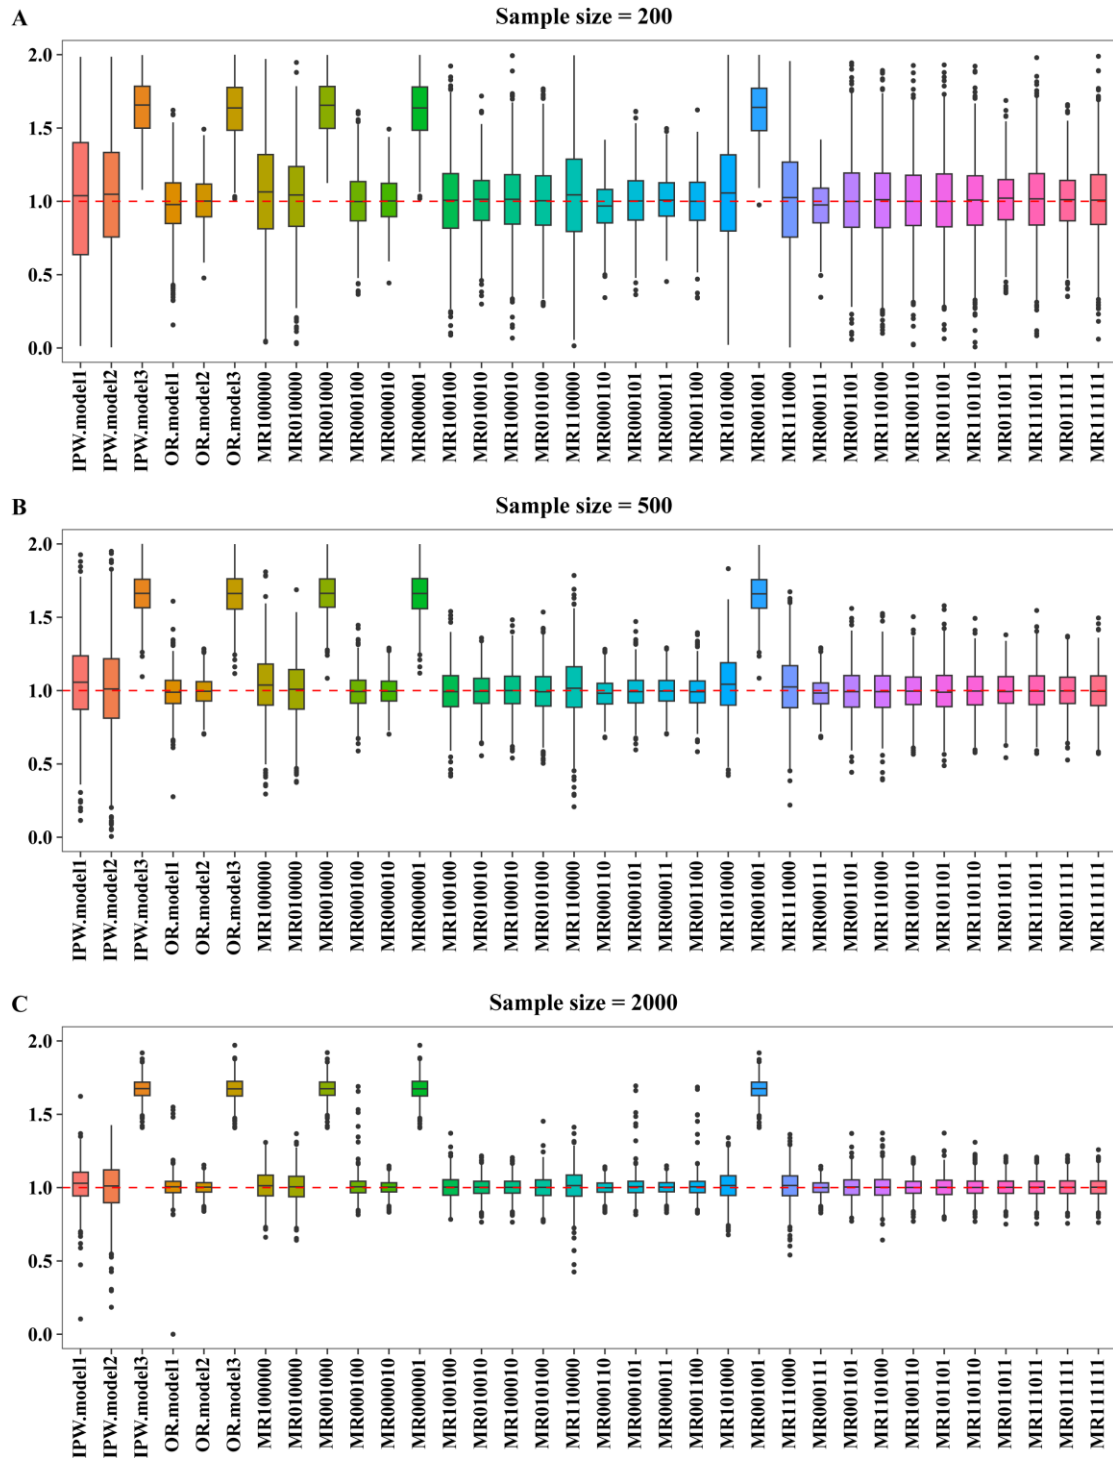

**Figure S1.** Simulation results with different sample sizes = 200, 500 or 2000 in the situation where the parametric models included the correct models and the neural network model included true covariates.

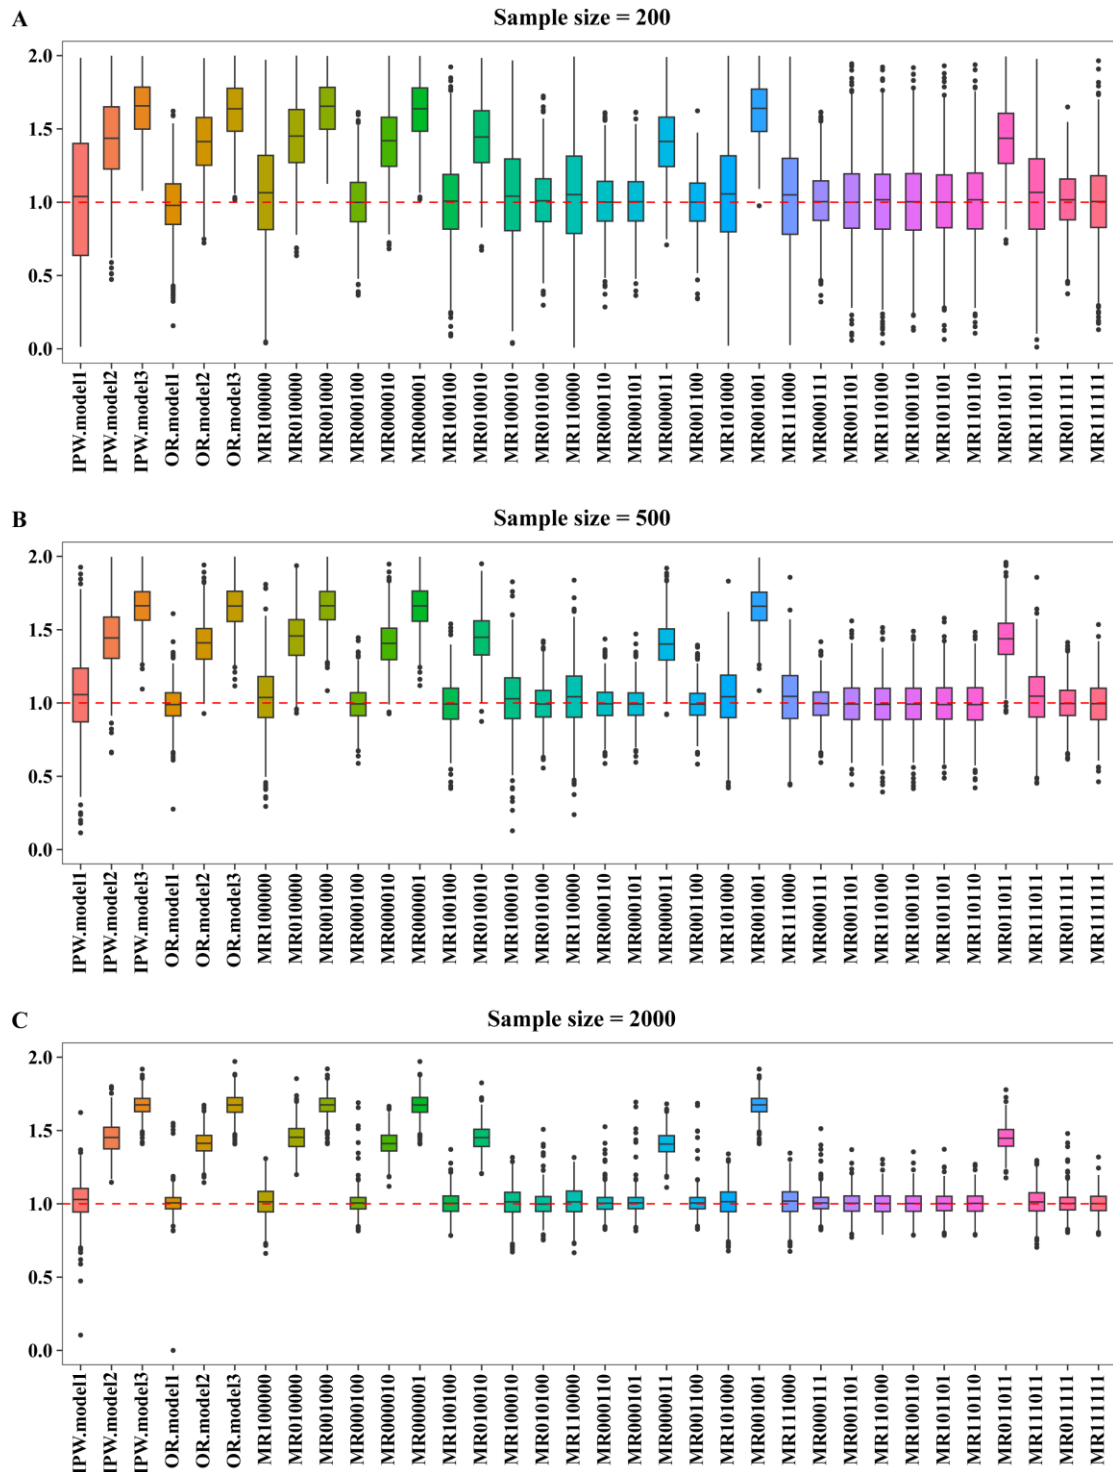

**Figure S2.** Simulation results with different sample sizes = 200, 500 or 2000 in the situation where the parametric models did not include the correct models and the neural network model included true covariates.

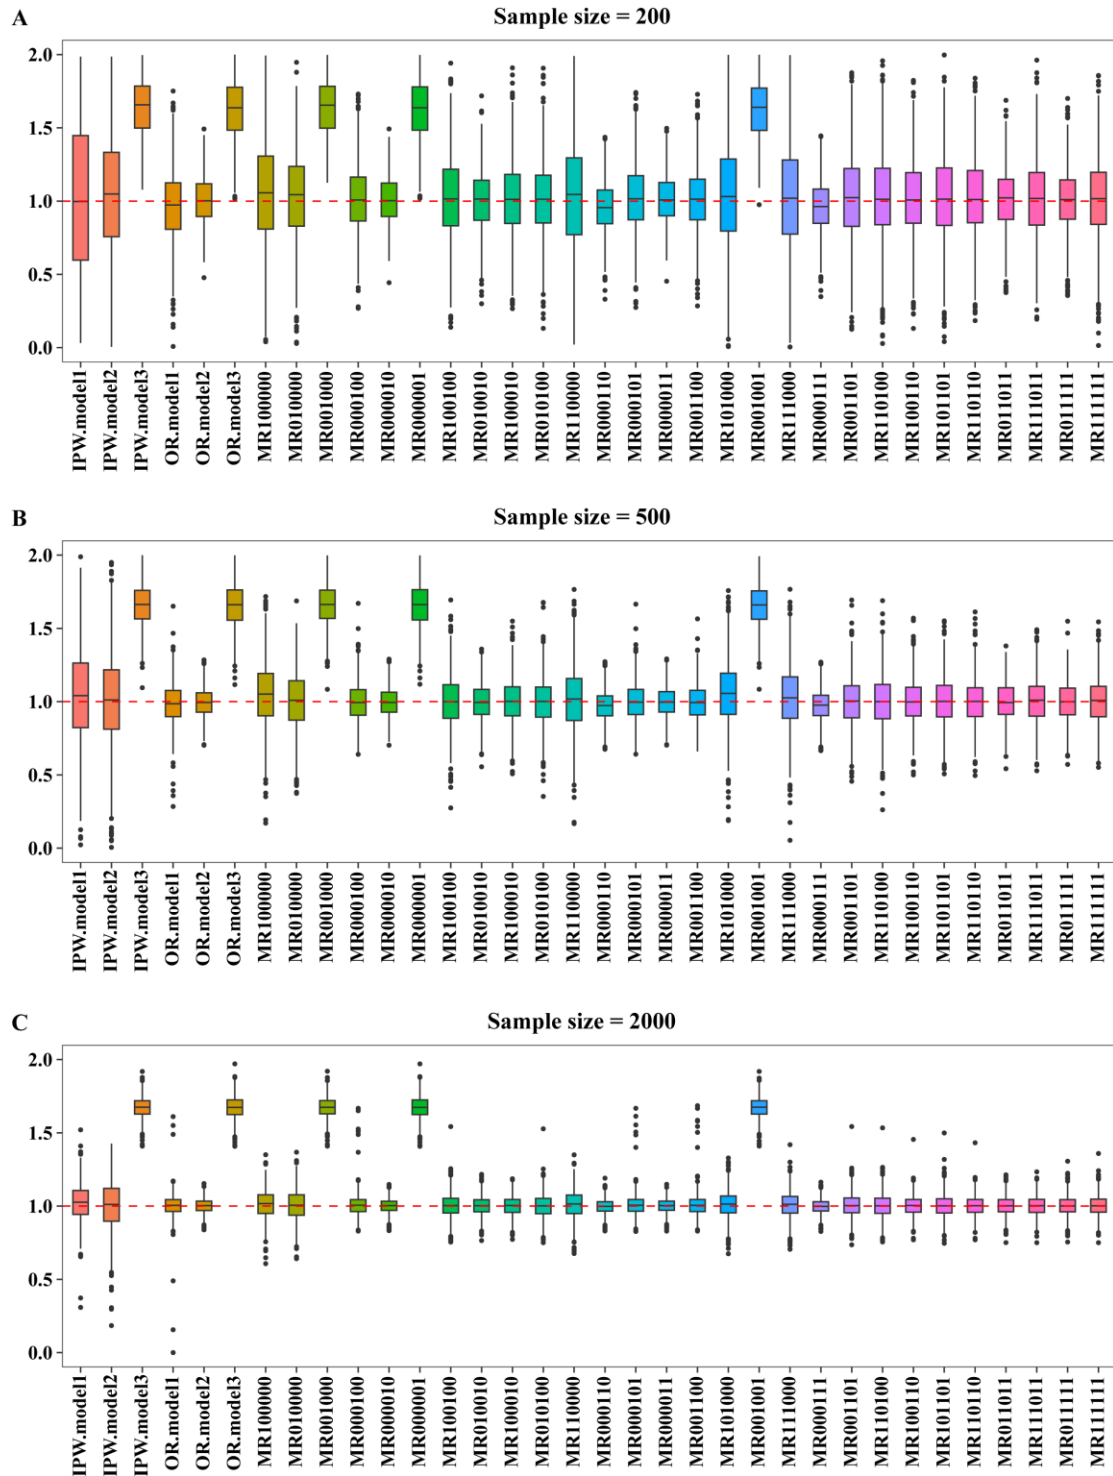

**Figure S3.** Simulation results with different sample sizes = 200, 500 or 2000 in the situation where the parametric models included the correct models and the neural network model included all covariates.

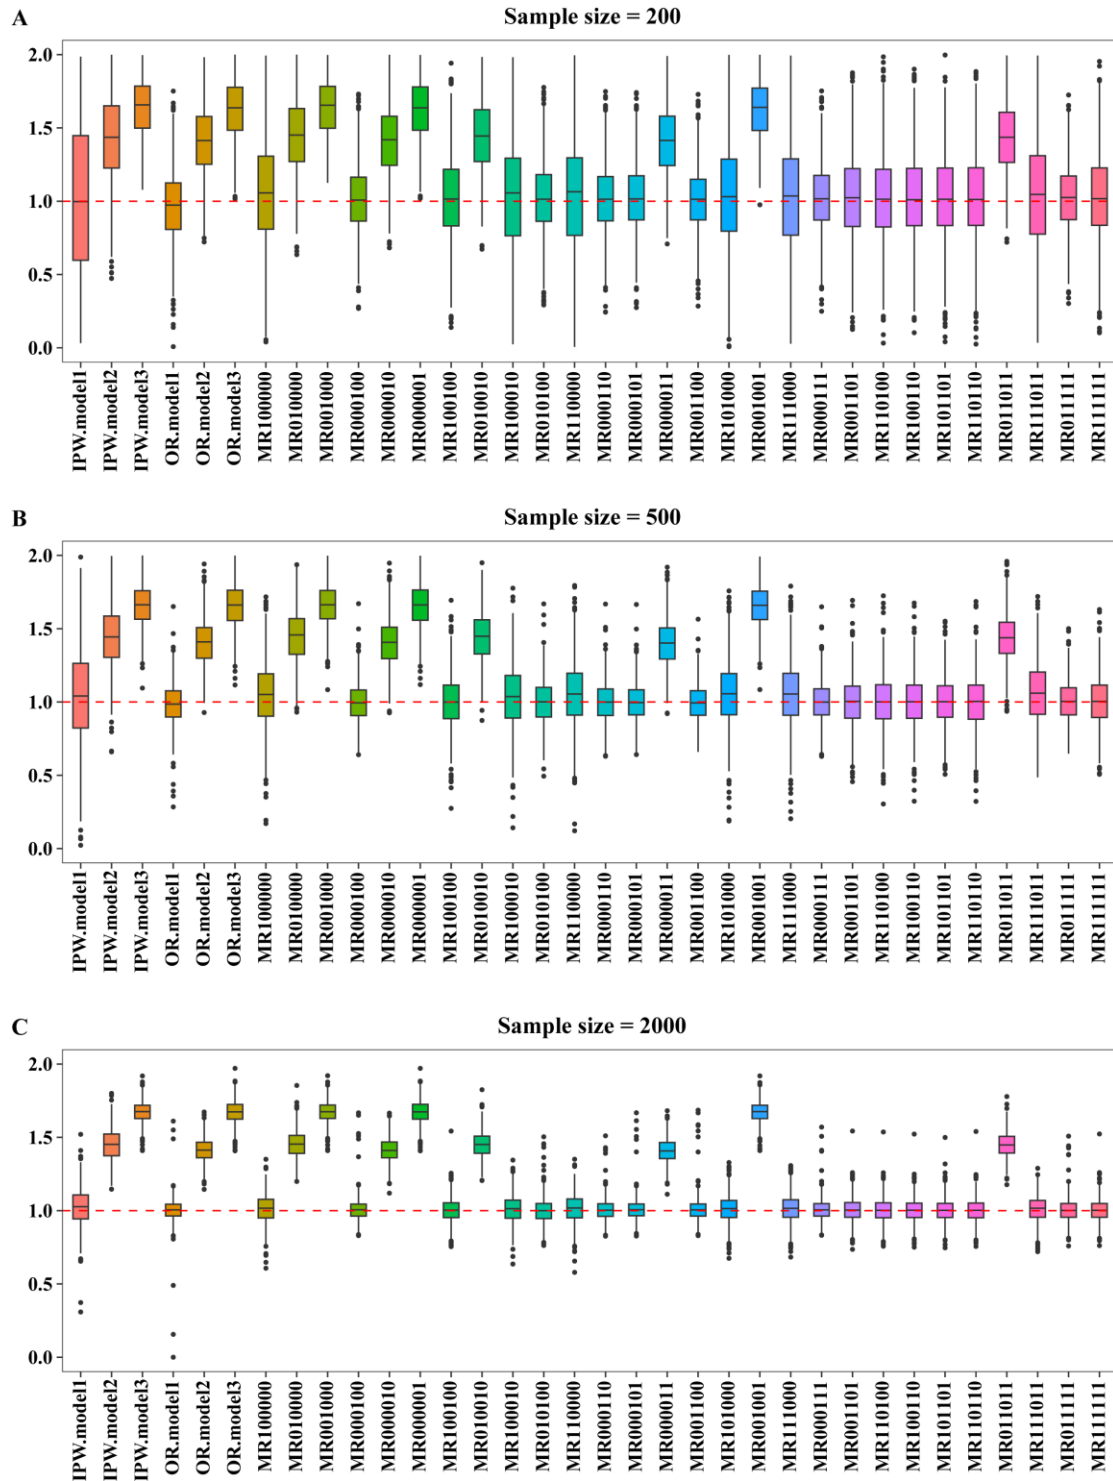

**Figure S4.** Simulation results with different sample sizes = 200, 500 or 2000 in the situation where the parametric models did not include the correct models and the neural network model included all covariates
